# Supplementary material for: Peritoneal Administration of a Subunit Vaccine Encapsulated in a Nanodelivery System Not Only Augments Systemic Responses against SARS-CoV-2 but Also Stimulates Responses in the Respiratory Tract
Source: MDPI journal article supplement (doi:10.3390/v13112202), 2021-11-02
Supplement: s1 [file s1]

## Supplement data

**Table S1 Physical properties of S-TMC NPs**

| Nanoparticles | Particle size (nm) | Polydispersity index | Zeta potential | % loading efficiency |
|---------------|--------------------|----------------------|----------------|----------------------|
|               |                    | (PDI)                | (mV)           | (LE)                 |
| TMC NPs       | 358.1 ± 7.404      | 0.354 ± 0.023        | 15.7 ± 0.551   | -                    |
| S-TMC NPs     | 343 ± 3.402        | 0.294 ± 0.023        | 14.9 ± 0.451   | 95.08 ± 4.50         |

Data are shown as mean ± SD of three independent experiments.

**Figure S1**

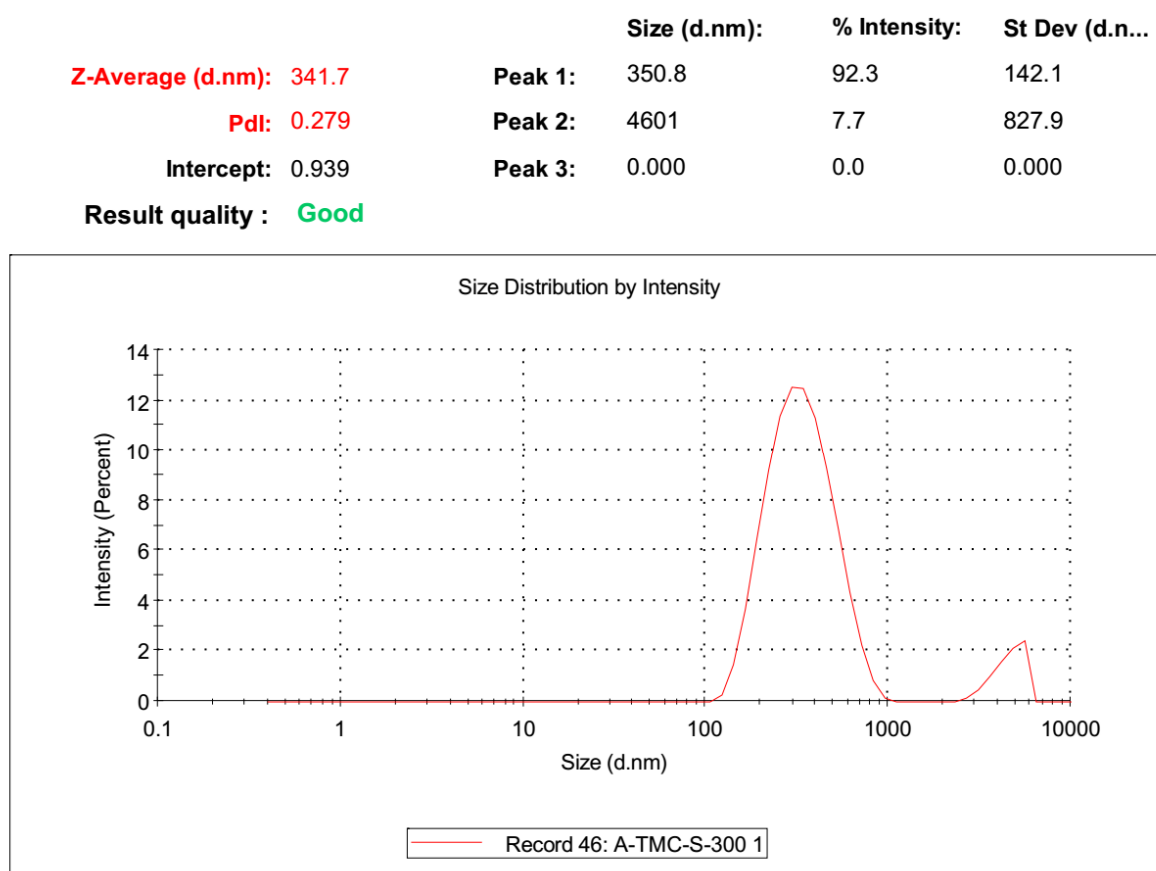

**Figure S1 Size distribution of S-TMC NPs by dynamic light scattering.** Data presents a representative experiment from three independent sets of data.

**Figure S2**

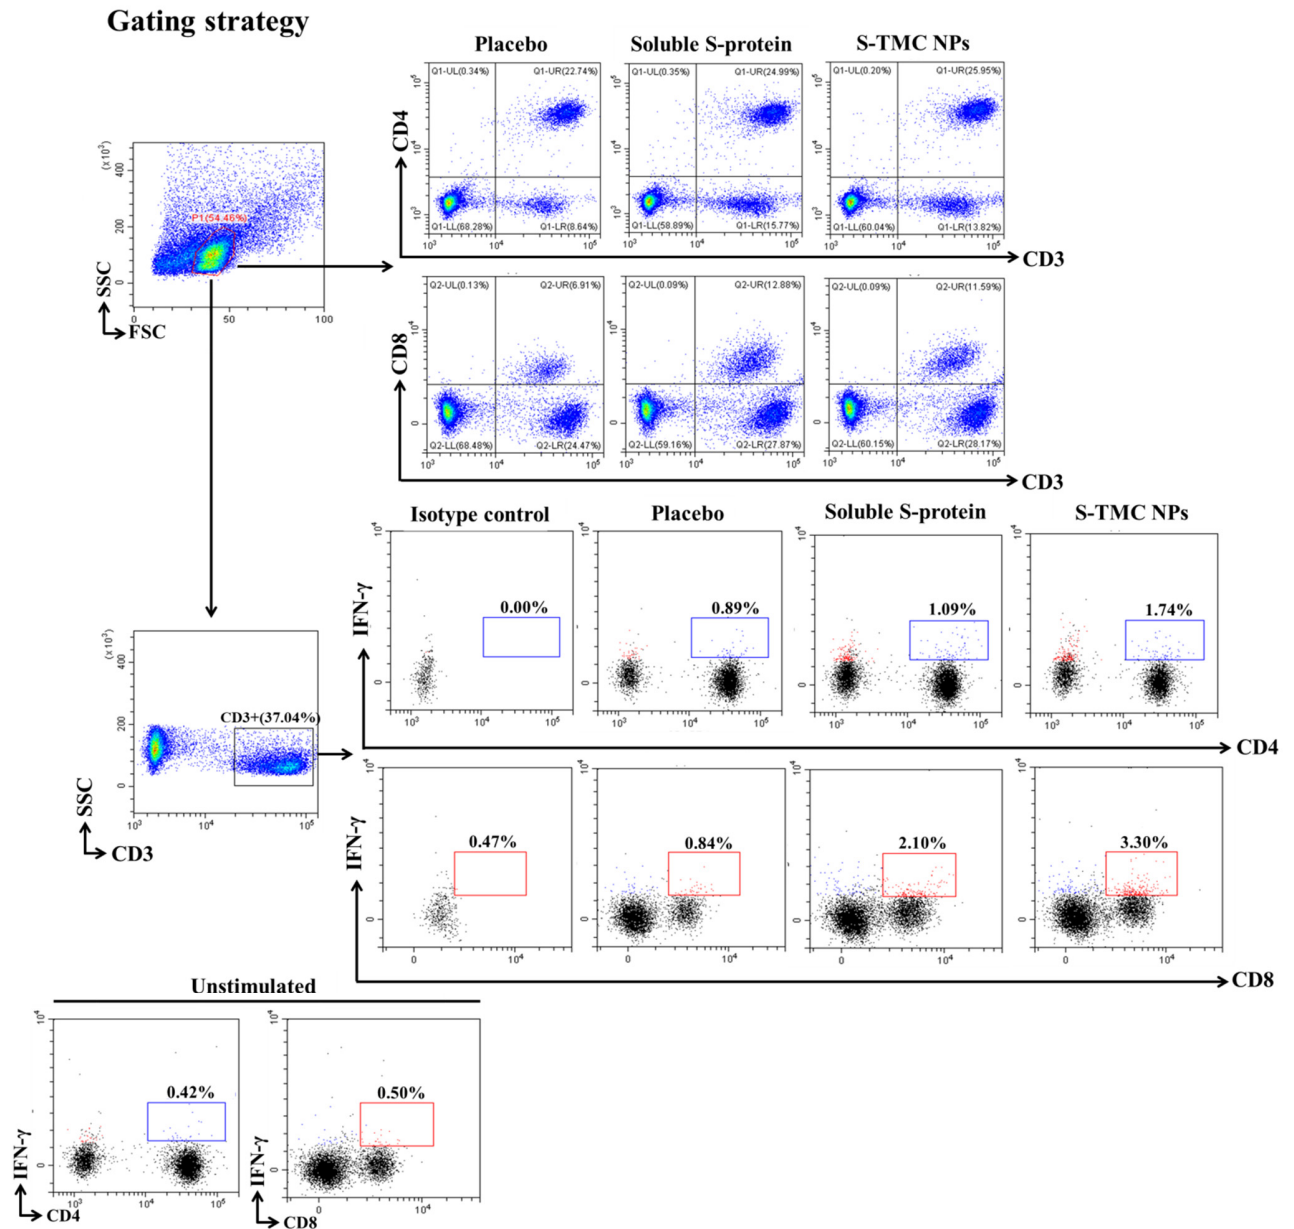

**Figure S2 Gating strategy used for quantitation of splenic T lymphocytes.** The cultivated splenocytes were *ex vivo* stimulated with 10 µg/mL of recombinant S-protein for 72 h. After treatment, stimulated cells were harvested and stained with antibodies specific to CD3, CD4,

CD8 and IFN- $\gamma$ . The percentages of CD3<sup>+</sup>CD4<sup>+</sup>, CD3<sup>+</sup>CD8<sup>+</sup>, IFN- $\gamma$ <sup>+</sup>CD4<sup>+</sup> and IFN- $\gamma$ <sup>+</sup> CD8<sup>+</sup> cells in cultivated splenocytes were determined by flow cytometry.
